# Supplementary material
Source: publisher site journal article supplement (https://www.dovepress.com/article/590096)
Supplement: Supplementary file 1 [file 590096%20Revised%20%2509Supplementary%20materials_1.docx]

**Supplementary table 1. Multiple comparisons**

|  |  | Knowledge | | | Attitude | | | Practice | | |
| --- | --- | --- | --- | --- | --- | --- | --- | --- | --- | --- |
| Statistic | P | Bonferroni P | Statistic | P | Bonferroni P | Statistic | P | Bonferroni P |
| BMI | Light VS Normal | -51.738 | 0.031 | 0.093 | 75.502 | 0.001 | 0.004 | 62.948 | 0.009 | 0.026 |
| Light VS Overweight or obese | -66.530 | 0.007 | 0.021 | 75.502 | 0.002 | 0.006 | 83.787 | <0.001 | 0.002 |
| Normal VS Overweight or obese | -14.792 | 0.188 | 0.565 | -0.646 | 0.953 | 1.000 | 20.839 | 0.064 | 0.191 |
| Smoking | Never VS Used to |  |  |  | -8.975 | 0.583 | 1.000 |  |  |  |
| Never VS Currently smoking |  |  |  | -34.551 | 0.002 | 0.006 |  |  |  |
| Used to VS Currently smoking |  |  |  | -25.577 | 0.113 | 0.339 |  |  |  |
| Drinking alcohol | Never VS Used to |  |  |  |  |  |  | 18.958 | 0.213 | 0.638 |
|  | Never VS Currently drinking |  |  |  |  |  |  | -21.373 | 0.067 | 0.201 |
|  | Used to VS Currently drinking |  |  |  |  |  |  | -40.331 | 0.007 | 0.022 |

**Supplementary table 2. Distribution of knowledge dimension responses**

| Items | **N (%)** | | |
| --- | --- | --- | --- |
| **0** | **1** | **2** |
| **1. How well do you understand chronic prostatitis, a common condition, in daily life?** | 62 (18.34%) | 249 (73.67%) | 27 (7.99%) |
| **2. Do you know what might cause chronic prostatitis?** | 79 (23.37%) | 155 (45.86%) | 104 (30.77%) |
| **3. What are the commonly used treatments for chronic prostatitis?** | 84 (24.85%) | 66 (19.53%) | 188 (55.62%) |
| **4. Are you aware that electrophysiological techniques can be used to treat chronic prostatitis?** | 108 (31.95%) | 102 (30.18%) | 128 (37.87%) |
| **5. What are the possible benefits of electrophysiological therapy for chronic prostatitis?** | 205 (60.65%) | - | 133 (39.35%) |
| **6. Are there any side effects of electrophysiological therapy for chronic prostatitis?** | 172 (50.89%) | 60 (17.75%) | 1. (1.36%) |
| **7.Do you know which parts of the body the electrodes are placed on during electrophysiological therapy?** | 290 (85.8%) | - | 48 (14.2%) |
| **8.What is the typical treatment duration for electrophysiological therapy for chronic prostatitis?** | 125 (36.98%) | 89 (26.33%) | 124 (36.69%) |
| **9.Which factors may affect the effectiveness of electrophysiological therapy for chronic prostatitis?** | 112 (33.14%) | 82 (24.26%) | 144 (42.6%) |
| **10. What should be paid attention to during electrophysiological therapy?** | 192 (56.8%) | 45 (13.31%) | 101 (29.88%) |
| **11. Which chronic prostatitis patients may not be suitable for electrophysiological therapy?** | 126 (37.28%) | 99 (29.29%) | 113 (33.43%) |

**Supplementary table 3. Distribution of attitude dimension responses**

| **Items** | **N (%)** | | | | |
| --- | --- | --- | --- | --- | --- |
| **Strongly agree** | **Agree** | **Neutral** | **Disagree** | **Strongly disagree** |
| **1. I believe that understanding knowledge about electrophysiological therapy for chronic prostatitis is very important for my recovery.** | 63 (18.64) | 144 (42.6) | 124 (36.69) | 2 (0.59) | 5 (1.48) |
| **2. I highly trust the doctor’s recommendation to use electrophysiological therapy for chronic prostatitis.** | 62 (18.34) | 135 (39.94) | 137 (40.53) | 2 (0.59) | 2 (0.59) |
| **3. I feel very happy and hopeful when I learn that electrophysiological therapy can be used to treat my chronic prostatitis.** | 63 (18.64) | 116 (34.32) | 152 (44.97) | 5 (1.48) | 2 (0.59) |
| **4. I am very concerned about possible discomfort during electrophysiological therapy.** | 58 (17.16) | 84 (24.85) | 186 (55.03) | 6 (1.78) | 4 (1.18) |
| **5. I am confident that electrophysiological therapy can improve my symptoms and quality of life.** | 53 (15.68) | 99 (29.29) | 177 (52.37) | 5 (1.48) | 4 (1.18) |
| **6. I believe that family members should play a fully supportive and supervisory role during my treatment.** | 60 (17.75) | 88 (26.04) | 184 (54.44) | 3 (0.89) | 3 (0.89) |
| **7. I am optimistic about the future development of electrophysiological therapy for chronic prostatitis.** | 56 (16.57) | 70 (20.71) | 205 (60.65) | 4 (1.18) | 3 (0.89) |
| **8. I believe electrophysiological therapy is currently the best treatment option for my chronic prostatitis.** | 48 (14.2) | 92 (27.22) | 187 (55.33) | 7 (2.07) | 4 (1.18) |
| **9. I believe that sharing experiences with other patients undergoing electrophysiological therapy can help in my recovery.** | 57 (16.86) | 95 (28.11) | 179 (52.96) | 5 (1.48) | 2 (0.59) |
| **10. I am very willing to try electrophysiological therapy in combination with other treatment options for chronic prostatitis.** | 57 (16.86) | 102 (30.18) | 171 (50.59) | 6 (1.78) | 2 (0.59) |

**Supplementary table 4. Distribution of practice dimension responses**

| **Items** | **N (%)** | | | | |
| --- | --- | --- | --- | --- | --- |
| **Always** | **Often** | **Occasionally** | **Rarely** | **Never** |
| **1. I follow the doctor’s instructions and undergo electrophysiological therapy on schedule.** | 69 (20.41) | 133 (39.35) | 65 (19.23) | 18 (5.33) | 53 (15.68) |
| **2. I pay attention to keeping the treatment area clean during the therapy period.** | 92 (27.22) | 142 (42.01) | 46 (13.61) | 13 (3.85) | 45 (13.31) |
| **3. I make lifestyle adjustments as advised by the doctor (e.g., avoiding prolonged sitting, eating a light diet).** | 82 (24.26) | 144 (42.6) | 61 (18.05) | 14 (4.14) | 37 (10.95) |
| **4. I monitor my symptoms during treatment and provide timely feedback to my doctor.** | 82 (24.26) | 121 (35.8) | 81 (23.96) | 15 (4.44) | 39 (11.54) |
| **5. I strictly follow the doctor’s instructions for using electrodes or patches.** | 85 (25.15) | 124 (36.69) | 78 (23.08) | 11 (3.25) | 40 (11.83) |
| **6. I actively participate in rehabilitation exercises or other supportive treatments arranged by the doctor.** | 82 (24.26) | 106 (31.36) | 94 (27.81) | 15 (4.44) | 41 (12.13) |
| **7. I go to the hospital for regular follow-up visits to track treatment progress.** | 70 (20.71) | 111 (32.84) | 96 (28.4) | 20 (5.92) | 41 (12.13) |
| **8. I would recommend electrophysiological therapy to other patients with chronic prostatitis.** | 66 (19.53) | 69 (20.41) | 130 (38.46) | 21 (6.21) | 52 (15.38) |
| **9. I actively communicate with my doctor about issues and feelings during the treatment process.** | 74 (21.89) | 99 (29.29) | 104 (30.77) | 15 (4.44) | 46 (13.61) |
| **10. I keep up with the latest research findings and technological advancements in electrophysiological therapy.** | 67 (19.82) | 66 (19.53) | 83 (24.56) | 73 (21.6) | 49 (14.5) |

**Supplementary table 5. Factor loadings of confirmatory factor analysis**

|  |  |  | Estimate | Std. Estimate | S.E. | C.R. | P |
| --- | --- | --- | --- | --- | --- | --- | --- |
| K13 | <--- | Knowledge | 1 | 0.835 |  |  |  |
| K12 | <--- | Knowledge | 1.003 | 0.79 | 0.058 | 17.375 | <0.001 |
| K11 | <--- | Knowledge | 1.038 | 0.841 | 0.054 | 19.196 | <0.001 |
| K10 | <--- | Knowledge | 1.001 | 0.818 | 0.055 | 18.352 | <0.001 |
| K9 | <--- | Knowledge | 0.448 | 0.45 | 0.053 | 8.514 | <0.001 |
| K8 | <--- | Knowledge | 0.894 | 0.708 | 0.06 | 14.854 | <0.001 |
| K7 | <--- | Knowledge | 0.797 | 0.572 | 0.071 | 11.269 | <0.001 |
| K6 | <--- | Knowledge | 0.995 | 0.838 | 0.052 | 19.051 | <0.001 |
| K5 | <--- | Knowledge | -0.688 | -0.666 | 0.05 | -13.667 | <0.001 |
| K4 | <--- | Knowledge | 0.88 | 0.733 | 0.057 | 15.575 | <0.001 |
| K3 | <--- | Knowledge | 0.794 | 0.761 | 0.048 | 16.448 | <0.001 |
| K2 | <--- | Knowledge | 0.736 | 0.705 | 0.05 | 14.758 | <0.001 |
| K1 | <--- | Knowledge | -0.239 | -0.334 | 0.039 | -6.147 | <0.001 |
| A1 | <--- | Attitude | 1 | 0.709 |  |  |  |
| A2 | <--- | Attitude | 1.12 | 0.828 | 0.075 | 14.947 | <0.001 |
| A3 | <--- | Attitude | 1.173 | 0.833 | 0.078 | 15.046 | <0.001 |
| A4 | <--- | Attitude | -1.025 | -0.705 | 0.081 | -12.713 | <0.001 |
| A5 | <--- | Attitude | 1.205 | 0.851 | 0.078 | 15.369 | <0.001 |
| A6 | <--- | Attitude | 1.217 | 0.854 | 0.079 | 15.429 | <0.001 |
| A7 | <--- | Attitude | 1.275 | 0.902 | 0.078 | 16.279 | <0.001 |
| A8 | <--- | Attitude | 1.169 | 0.834 | 0.078 | 15.064 | <0.001 |
| A9 | <--- | Attitude | 1.247 | 0.891 | 0.077 | 16.095 | <0.001 |
| A10 | <--- | Attitude | 1.235 | 0.882 | 0.078 | 15.918 | <0.001 |
| P1 | <--- | Practice | 1 | 0.784 |  |  |  |
| P2 | <--- | Practice | 1.095 | 0.873 | 0.058 | 18.727 | <0.001 |
| P3 | <--- | Practice | 1.079 | 0.916 | 0.054 | 20.054 | <0.001 |
| P4 | <--- | Practice | 1.14 | 0.948 | 0.054 | 21.109 | <0.001 |
| P5 | <--- | Practice | 1.129 | 0.937 | 0.054 | 20.741 | <0.001 |
| P6 | <--- | Practice | 1.121 | 0.921 | 0.056 | 20.206 | <0.001 |
| P7 | <--- | Practice | 1.109 | 0.924 | 0.055 | 20.311 | <0.001 |
| P8 | <--- | Practice | 1.064 | 0.857 | 0.058 | 18.267 | <0.001 |
| P9 | <--- | Practice | 1.106 | 0.898 | 0.057 | 19.484 | <0.001 |
| P10 | <--- | Practice | 1.037 | 0.796 | 0.063 | 16.534 | <0.001 |

| Questionnaire ID: |
| --- |
| Dear Participant,  We are researchers from XXX Hospital and sincerely invite you to participate in our research study. This study aims to understand the knowledge, attitudes, and practices of patients with chronic prostatitis (CP) regarding the use of electrophysiological techniques in CP treatment. The results will help provide a scientific basis for developing effective intervention strategies, potentially benefiting more individuals and improving patient health outcomes in the future. Your participation in this study is completely voluntary. The study has been reviewed and approved by the Ethics Review Committee. If you agree to participate, please read the following instructions carefully:  1. Please complete the questionnaire. There are no right or wrong answers; simply respond based on your actual situation. If you encounter any questions during the process, feel free to contact us. After completion, please submit the questionnaire promptly.  2. This study involves a simple questionnaire survey and poses no harm to your physical or mental health. However, it includes some personal questions such as your age and gender. All your information will be kept strictly confidential, so please feel free to provide honest responses.  3. As a participant, you have the right to access information related to this study and its progress. If you decide to withdraw from the study, please inform us, and your data will not be included in the final analysis.  We sincerely thank you for taking time out of your busy schedule to support our scientific research!  □I have read and agree that the data collected may be used for scientific research.  Informed Consent Signature:  Date of Participation: ____ / ____ / ______ (Year / Month / Day) |

| **Part 1 Basic Information** | |
| --- | --- |
| **1. Your gender:** | a. Male  b. Female |
| **2. Your age: ______ years (Set as a slider in the questionnaire tool)** | |
| **3. Your height: ______ cm (Set as a slider in the questionnaire tool)** | |
| **4. Your weight: ______ kg (Set as a slider in the questionnaire tool)** | |
| **5. Your education level:** | a. Primary school or below b. Junior high school c. Senior high school / Technical secondary school d. College / Bachelor's degree e. Master's degree or above |
| **6. Your ethnicity:** | a. Han b. Ethnic minority |
| **7. Your employment status:** | a. Employed b. Unemployed c. Retired d. Self-employed e. Other |
| **8. Your occupation type:** | a. Medical-related professional b. Non-medical-related professional |
| **9. What was your household's average monthly income per person over the past year (including in-kind and rental income)?** | a.<2000  b.2000-5000  c.5000-10000  d. >10000 |
| **10. Do you smoke?** | a. Never b. Used to smoke c. Currently smoking |
| **11. Do you drink alcohol?** | a. Never b. Used to drink c. Currently drinking |
| **12.** **Do you have any of the following chronic conditions? (Select all that apply)** | a. Hypertension b. Diabetes c. Rheumatoid arthritis d. Stroke e. Chronic obstructive pulmonary disease (COPD) f. Coronary heart disease g. None of the above h. Not sure |
| **13. What type of medical insurance do you have?** | a. Urban employee basic medical insurance b. Urban-rural resident medical insurance c. No insurance |
| **14. Do you have any family members or friends who suffer from prostate-related conditions?** | a. Yes b. No |

| **Part 2 Knowledge About Electrophysiological Therapy for Chronic Prostatitis** |
| --- |
| **Single-choice questions**  1. How well do you understand chronic prostatitis, a common condition, in daily life?  A. Very familiar — chronic prostatitis is also known as chronic pelvic pain syndrome B. Have heard of it but not very clear C. Not familiar at all  2. What are the main symptoms of chronic prostatitis? *(Multiple choice)*  A. Frequent urination, urgency, feeling of incomplete voiding, burning sensation in the urethra B. Pain in the perineum, testicles, and other areas C. Sexual dysfunction D. Don’t know  3. Do you know what might cause chronic prostatitis? *(Multiple choice)*  A. Infections (e.g., Mycoplasma, Chlamydia), inflammation B. Abnormal autoimmune response C. Nerve injury D. Don’t know  4. What are the commonly used treatments for chronic prostatitis? *(Multiple choice)*  A. Medication (e.g., anti-infective drugs, anti-inflammatory drugs, traditional Chinese medicine) B. Physical therapy (e.g., electrical stimulation, acupuncture, external TCM treatments like fumigation or patches) C. Don’t know  5. Are you aware that electrophysiological techniques can be used to treat chronic prostatitis?  A. Yes — it refers to low-frequency neuromuscular electrical stimulation B. Have heard of it but not very familiar C. Not aware  6. What are the possible benefits of electrophysiological therapy for chronic prostatitis? *(Multiple choice)*  A. Pain relief B. Improved local blood circulation C. Improved pelvic floor muscle function D. Don’t know  7. Are there any side effects of electrophysiological therapy for chronic prostatitis?  A. Some, but not serious B. No side effects C. Not sure  8. Do you know which parts of the body the electrodes are placed on during electrophysiological therapy? *(Multiple choice)*  A. Groin and lower abdomen B. Acupoints: Henggu (located on the midline above the pubic symphysis) and Sanyinjiao (on the inner leg, 3 cun above the tip of the medial malleolus, just behind the medial border of the tibia) C. Don’t know  9. What is the typical treatment duration for electrophysiological therapy for chronic prostatitis?  A. 21 days B. 14 days C. Don’t know  10. Which factors may affect the effectiveness of electrophysiological therapy for chronic prostatitis? *(Multiple choice)*  A. Treatment adherence B. Severity of the condition C. General health status D. Don’t know  11. What should be paid attention to during electrophysiological therapy? *(Multiple choice)*  A. Keep the treatment area clean B. Inform the physician thoroughly about your medical history C. Inform the technician if you feel any discomfort during treatment D. Don’t know  12. Which chronic prostatitis patients may not be suitable for electrophysiological therapy? *(Multiple choice)*  A. Those with urinary tract infections B. Those with concurrent seminal vesiculitis C. Those with a history of epididymitis D. Don’t know |

| **Part 3 Attitudes Toward Electrophysiological Therapy for Chronic Prostatitis** | | | | | |
| --- | --- | --- | --- | --- | --- |
| 1. I believe that understanding knowledge about electrophysiological therapy for chronic prostatitis is very important for my recovery. | a. strongly agree | b. agree | c. neutral | d. disagree | e. strongly disagree |
| 2. I highly trust the doctor’s recommendation to use electrophysiological therapy for chronic prostatitis. | a. strongly agree | b. agree | c. neutral | d. disagree | e. strongly disagree |
| 3. I feel very happy and hopeful when I learn that electrophysiological therapy can be used to treat my chronic prostatitis. | a. strongly agree | b. agree | c. neutral | d. disagree | e. strongly disagree |
| 4. I am very concerned about possible discomfort during electrophysiological therapy. | a. strongly agree | b. agree | c. neutral | d. disagree | e. strongly disagree |
| 5. I am confident that electrophysiological therapy can improve my symptoms and quality of life. | a. strongly agree | b. agree | c. neutral | d. disagree | e. strongly disagree |
| 6. I believe that family members should play a fully supportive and supervisory role during my treatment. | a. strongly agree | b. agree | c. neutral | d. disagree | e. strongly disagree |
| 7. I am optimistic about the future development of electrophysiological therapy for chronic prostatitis. | a. strongly agree | b. agree | c. neutral | d. disagree | e. strongly disagree |
| 8. I believe electrophysiological therapy is currently the best treatment option for my chronic prostatitis. | a. strongly agree | b. agree | c. neutral | d. disagree | e. strongly disagree |
| 9. I believe that sharing experiences with other patients undergoing electrophysiological therapy can help in my recovery. | a. strongly agree | b. agree | c. neutral | d. disagree | e. strongly disagree |
| 10. I am very willing to try electrophysiological therapy in combination with other treatment options for chronic prostatitis. | a. strongly agree | b. agree | c. neutral | d. disagree | e. strongly disagree |

| **Part 4 Behavioral Practices Related to Electrophysiological Therapy for Chronic Prostatitis** | | | | | |
| --- | --- | --- | --- | --- | --- |
| 1. I follow the doctor’s instructions and undergo electrophysiological therapy on schedule. | a. always | b. often | c. occasionally | d. rarely | e. never |
| 2. I pay attention to keeping the treatment area clean during the therapy period. | a. always | b. often | c. occasionally | d. rarely | e. never |
| 3. I make lifestyle adjustments as advised by the doctor (e.g., avoiding prolonged sitting, eating a light diet). | a. always | b. often | c. occasionally | d. rarely | e. never |
| 4. I monitor my symptoms during treatment and provide timely feedback to my doctor. | a. always | b. often | c. occasionally | d. rarely | e. never |
| 5. I strictly follow the doctor’s instructions for using electrodes or patches. | a. always | b. often | c. occasionally | d. rarely | e. never |
| 6. I actively participate in rehabilitation exercises or other supportive treatments arranged by the doctor. | a. always | b. often | c. occasionally | d. rarely | e. never |
| 7. I go to the hospital for regular follow-up visits to track treatment progress. | a. always | b. often | c. occasionally | d. rarely | e. never |
| 8. I would recommend electrophysiological therapy to other patients with chronic prostatitis. | a. always | b. often | c. occasionally | d. rarely | e. never |
| 9. I actively communicate with my doctor about issues and feelings during the treatment process. | a. always | b. often | c. occasionally | d. rarely | e. never |
| 10. I keep up with the latest research findings and technological advancements in electrophysiological therapy. | a. always | b. often | c. occasionally | d. rarely | e. never |

| **Thank you again for filling out our questionnaire, the information you provided will be valuable to us in the future!**  **Thank you for filling out our questionnaire！**  If you have any comments and suggestions on this survey, we would be honored to hear your voice.  Opinions and Suggestions: （optional）  In order to make this questionnaire study effective and to promote the smooth development of future return visits, we would be grateful if you could leave your contact information!  Your phone number: （optional） |
| --- |
